# Supplementary material for: AI-enabled ECG index for predicting left ventricular dysfunction in patients with ST-segment elevation myocardial infarction
Source: PubMed Central journal article supplement — Sci Rep. 2024 Jul 17;14:16575. doi: 10.1038/s41598-024-67532-6 (PMC11255326; doi:10.1038/s41598-024-67532-6), 2024-07-17
Supplement: 41598_2024_67532_MOESM1_ESM.pdf [file 41598_2024_67532_MOESM1_ESM.pdf]

**Supplement figure S1. Study flow**

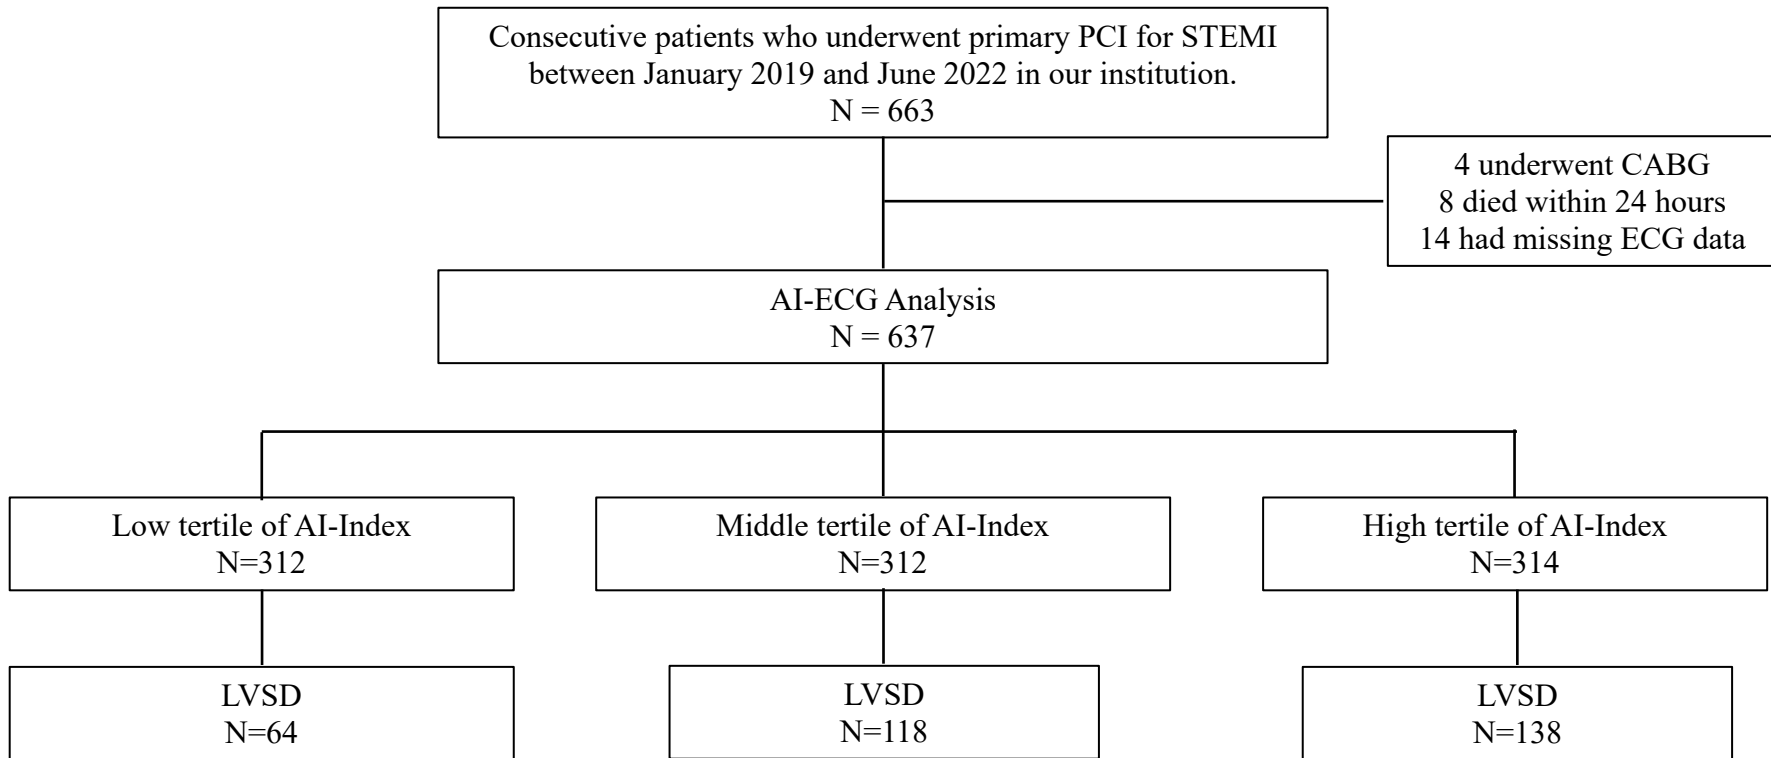

**Supplementary figure S2. ROC curves and AUC for predicting left ventricular dysfunction at different time points post- PCI in STEMI patients.**

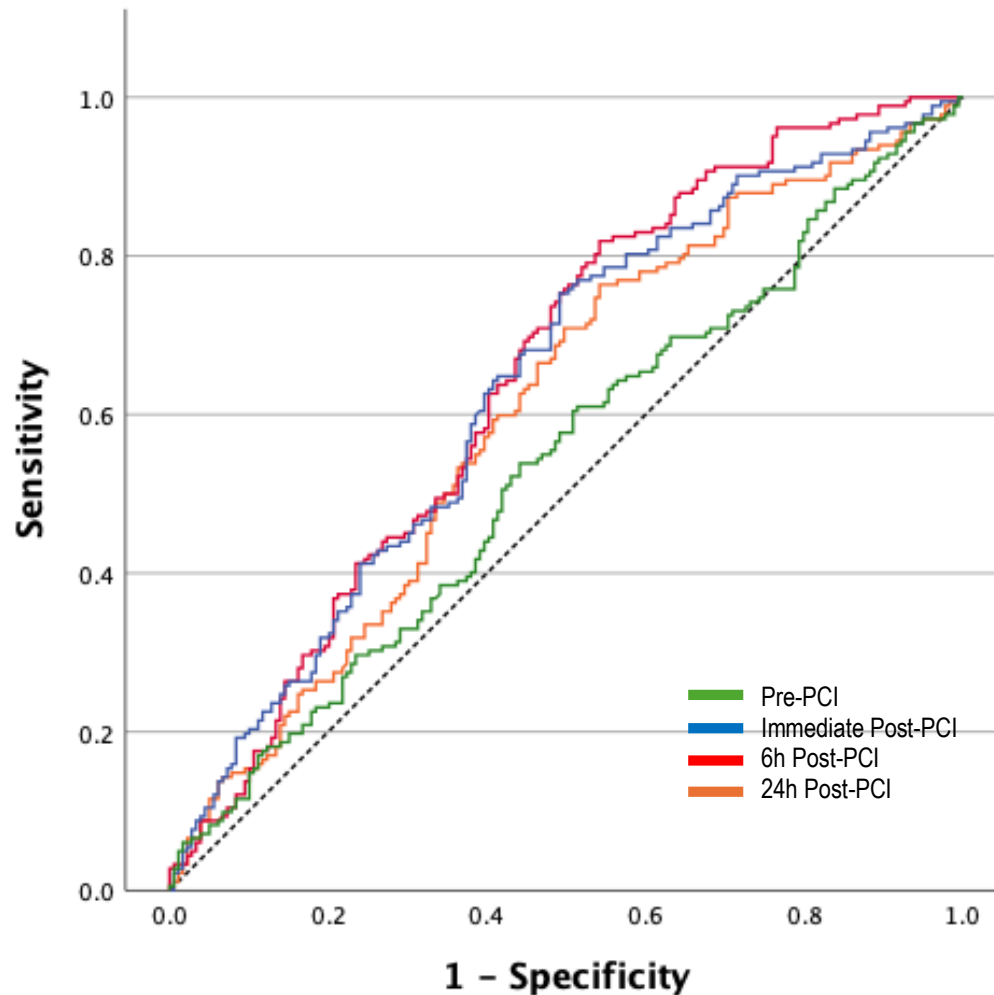

| Time points        | AUROC | 95% CI        | P-value |
|--------------------|-------|---------------|---------|
| Pre-PCI            | 0.537 | 0.478 - 0.597 | < 0.001 |
| Immediate Post-PCI | 0.637 | 0.580 - 0.694 | < 0.001 |
| 6h Post-PCI        | 0.667 | 0.625 - 0.708 | < 0.001 |
| 24h Post-PCI       | 0.607 | 0.548 - 0.665 | 0.219   |

AUROC indicates area under the receiver operating characteristics curve; CI, confidence interval; NPV, negative predictive value; PCI, percutaneous coronary intervention; PPV, positive predictive value; ROC, receiver operating characteristic; STEMI, ST-segment elevation myocardial infarction.

**Supplementary figure S3.** Proportion of LV dysfunction, defined as LVEF <40%, according to the AI-probability index.

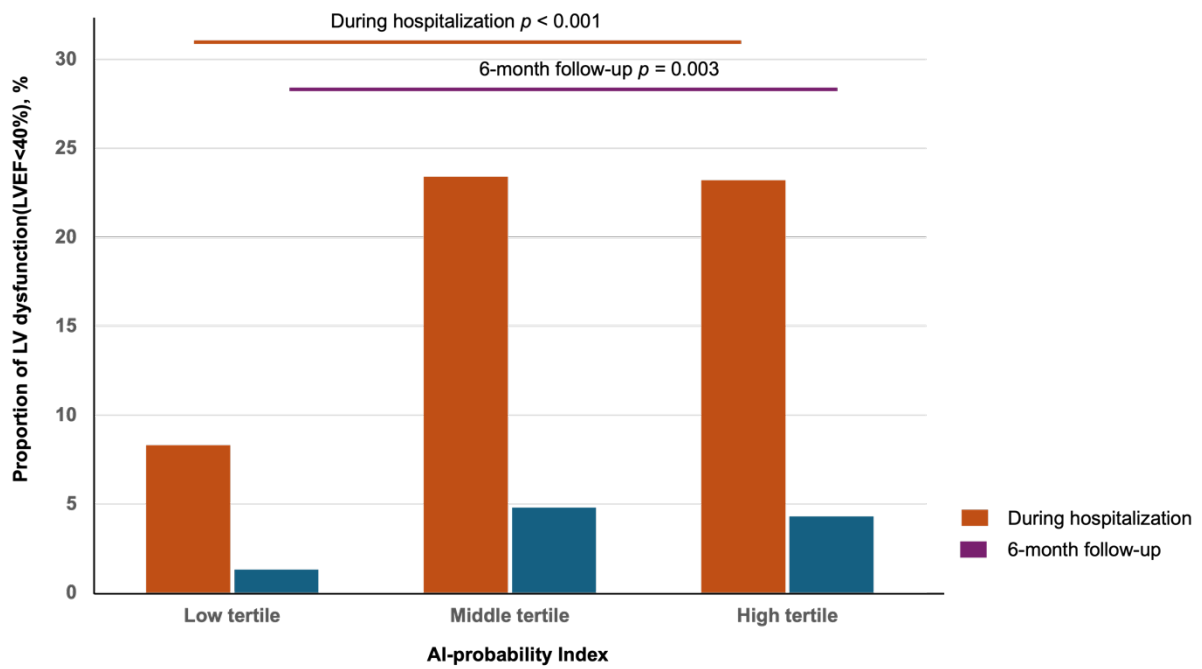

AI, artificial intelligence; LV, left ventricular; LVEF, left ventricular ejection fraction

## Supplement figure S4. LV remodeling according to AI-probability index

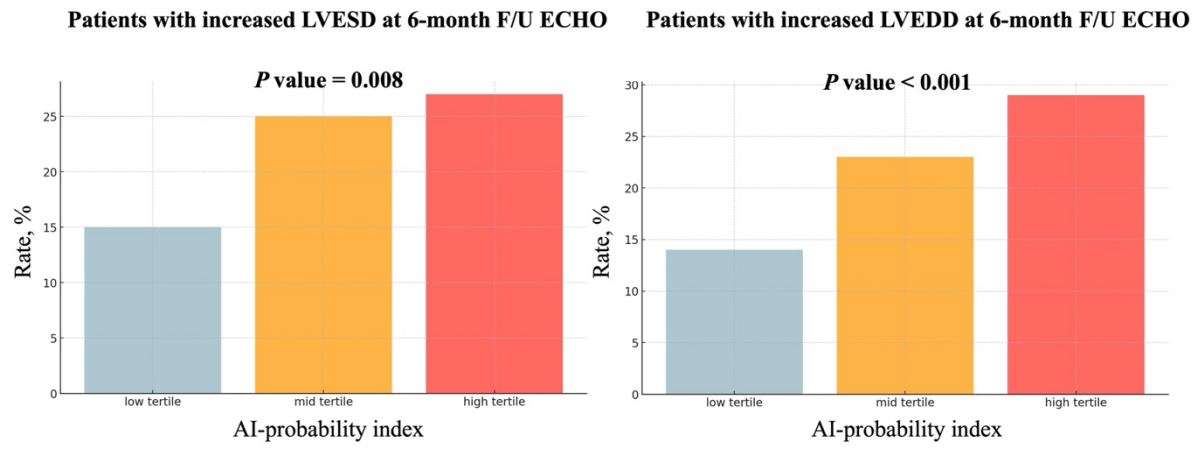

## Supplement figure S5. Representative case of AI-enabled ECG analysis in STEMI patients

**A. 63Yo Male, LVEF = 56% during hospital stay, LVEF = 59% at 6-month follow-up**

**Pre-PCI**

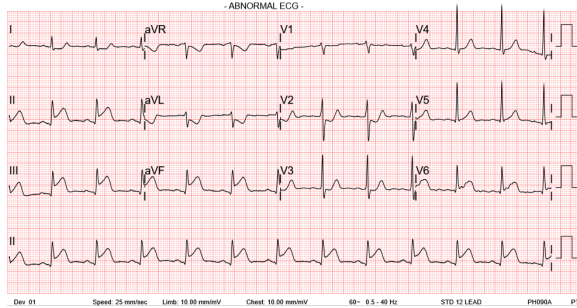

**AI-STEMI probability index 0.933**

**6-hour post-PCI**

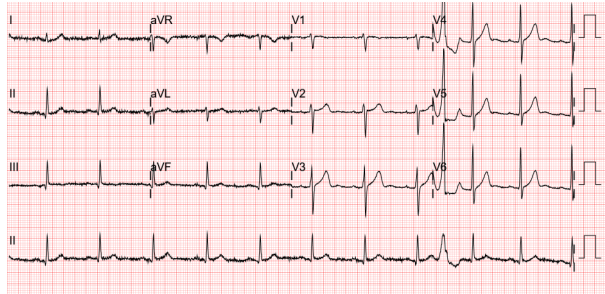

**AI-STEMI probability index 0.113**

**Immediate post-PCI**

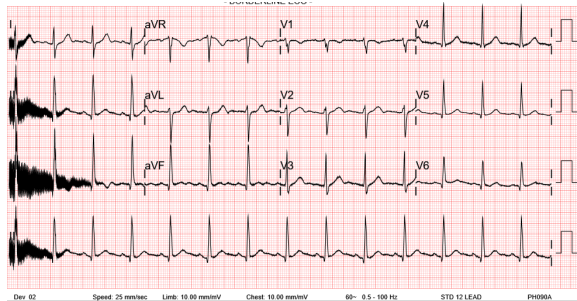

**AI-STEMI probability index 0.420**

**1-month post-PCI**

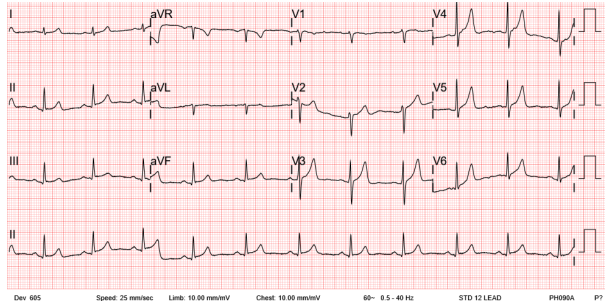

**AI-STEMI probability index 0.065**

**B. 78Yo Female, LVEF = 34% during hospital stay, LVEF = 32% at 6-month follow-up**

**Pre-PCI**

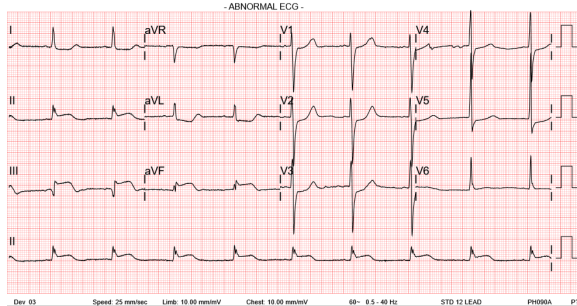

**AI-STEMI probability index 0.966**

**6-hour post-PCI**

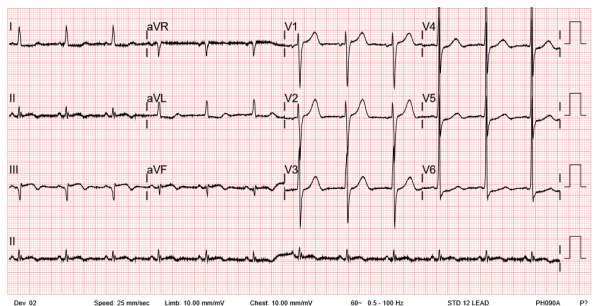

**AI-STEMI probability index 0.738**

**Immediate post-PCI**

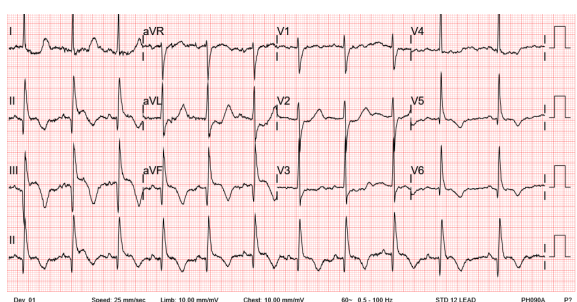

**AI-STEMI probability index 0.826**

**1-month post-PCI**

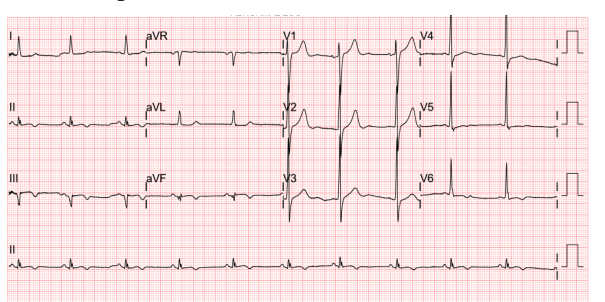

**AI-STEMI probability index 0.849**

**Supplementary Table 1. Sensitivity analysis of AI probability index of 6h Post-PCI ECG**

In terms of predicting LV dysfunction, the AUROC was found to be the highest for the 6 h Post-PCI time point. The optimal threshold was identified using Youden's index and at the cut-off, the results of the sensitivity analysis are shown in the table below.

| Sensitivity | Specificity | PPV   | NPV   |
|-------------|-------------|-------|-------|
| 0.812       | 0.467       | 0.606 | 0.712 |

**Supplementary Table S2. Multivariate analysis for predicting LV dysfunction defined as LVEF < 40%**

|                                     | Odd ratio | 95% CI        | <i>P</i> value |
|-------------------------------------|-----------|---------------|----------------|
| AI-probability index low tertile    |           | reference     |                |
| AI-probability index middle tertile | 2.840     | 1.416 – 5.695 | 0.003          |
| AI-probability index high tertile   | 2.020     | 1.005 – 4.062 | 0.049          |
| Age, years                          | 0.990     | 0.967 – 1.014 | 0.398          |
| Body mass index, kg/cm <sup>2</sup> | 0.931     | 0.862 – 1.005 | 0.066          |
| Female                              | 1.881     | 1.029 – 3.439 | 0.040          |
| Systolic blood pressure, mmHg       | 0.989     | 0.989 – 0.975 | 0.127          |
| Diastolic blood pressure, mmHg      | 1.002     | 0.980 – 1.024 | 0.875          |
| Pulse rate, bpm                     | 1.031     | 1.019 – 1.042 | < 0.001        |
| Killip ≥ Class 3                    | 2.205     | 1.116 – 4.355 | 0.023          |
| Hypertension                        | 0.584     | 0.345 – 0.989 | 0.045          |
| Diabetes                            | 0.963     | 0.543 – 1.709 | 0.898          |
| End-stage renal disease             | 1.626     | 0.299 – 8.851 | 0.574          |
| PCI to LM and/or LAD                | 2.714     | 1.559 – 4.726 | < 0.001        |
| eGFR, ml/min/1.73m <sup>2</sup>     | 0.977     | 0.964 – 0.989 | < 0.001        |
| Peak troponin I                     | 1.013     | 1.007 – 1.109 | < 0.001        |
| C-reactive protein, mg/dl           | 1.062     | 0.981 – 1.151 | 0.121          |
| Cholesterol, mg/dl                  | 1.004     | 0.996 – 1.001 | 0.324          |
| LDL cholesterol, mg/dl              | 0.996     | 0.987 – 1.005 | 0.450          |

AI, artificial intelligence; CI, confidence interval; PCI, percutaneous coronary intervention; LAD, left anterior descending artery; LDL, Low density lipoprotein; LM, left main coronary artery; LVEF, Left ventricular ejection fraction
